# Supplementary material
Source: PubMed Central journal article supplement (PMC8029211)
Supplement: BPA-27-95-s001.pdf [file BPA-27-95-s001.pdf]

## Supplementary Tables

**Supplementary Table I:** Gene expression of subunits of mitochondrial complexes in the mediodorsal thalamus in FFI and control cases normalized with XPNPEP1.

| Thalamus    | Probe           | Control     | FFI         | P value |    |
|-------------|-----------------|-------------|-------------|---------|----|
| Complex I   | <i>NDUFA2</i>   | 1.02 ± 0.20 | 0.79 ± 0.17 | 0.06    | -  |
|             | <i>NDUFA7</i>   | 1.02 ± 0.20 | 0.91 ± 0.34 | 0.50    | -  |
|             | <i>NDUFA10</i>  | 1.00 ± 0.10 | 0.96 ± 0.13 | 0.49    | -  |
|             | <i>NDUFB3</i>   | 1.02 ± 0.22 | 0.82 ± 0.15 | 0.10    | -  |
|             | <i>NDUFB7</i>   | 1.02 ± 0.2  | 0.87 ± 0.26 | 0.31    | -  |
|             | <i>NDUFB10</i>  | 1.02 ± 0.21 | 0.89 ± 0.23 | 0.34    | -  |
|             | <i>NDUFS7</i>   | 1.02 ± 0.22 | 0.91 ± 0.20 | 0.37    | -  |
|             | <i>NDUFS8</i>   | 1.01 ± 0.19 | 0.95 ± 0.41 | 0.73    | -  |
| Complex II  | <i>SDHB</i>     | 1.03 ± 0.24 | 0.87 ± 0.17 | 0.21    | -  |
| Complex III | <i>UQCR11</i>   | 1.03 ± 0.26 | 0.94 ± 0.19 | 0.50    | -  |
|             | <i>UQCRB</i>    | 1.06 ± 0.38 | 0.78 ± 0.31 | 0.20    | -  |
| Complex IV  | <i>COX7A2L</i>  | 1.03 ± 0.27 | 0.87 ± 0.15 | 0.25    | -  |
|             | <i>COX7C</i>    | 1.05 ± 0.37 | 1.01 ± 0.20 | 0.81    | -  |
| Complex V   | <i>ATP5D</i>    | 1.02 ± 0.22 | 0.63 ± 0.08 | 0.004   | ** |
|             | <i>ATP5G2</i>   | 1.01 ± 0.13 | 1.36 ± 0.48 | 0.09    | -  |
|             | <i>ATP5H</i>    | 1.02 ± 0.21 | 0.85 ± 0.20 | 0.18    | -  |
|             | <i>ATP5L</i>    | 1.01 ± 0.19 | 0.98 ± 0.20 | 0.76    | -  |
|             | <i>ATP5O</i>    | 1.02 ± 0.19 | 0.80 ± 0.19 | 0.09    | -  |
|             | <i>ATP6V0B</i>  | 1.06 ± 0.39 | 0.87 ± 0.15 | 0.34    | -  |
|             | <i>ATP6V1H1</i> | 1.13 ± 0.64 | 0.73 ± 0.13 | 0.21    | -  |
|             | <i>TOMM40</i>   | 1.03 ± 0.25 | 0.80 ± 0.12 | 0.08    | -  |

**Supplementary Table II:** Densitometric values of expression of mitochondrial proteins as revealed by western blotting in the mediodorsal thalamus in FFI cases and controls normalized with  $\beta$ -actin (A) and VDAC (B).

**A**

| Protein | Control         | FFI             | P value |    |
|---------|-----------------|-----------------|---------|----|
| NDUFB8  | 0.62 $\pm$ 0.12 | 0.44 $\pm$ 0.11 | 0.0257  | *  |
| SDHB    | 0.87 $\pm$ 0.11 | 0.65 $\pm$ 0.18 | 0.0426  | *  |
| UQCRB   | 1.87 $\pm$ 0.21 | 1.70 $\pm$ 0.36 | 0.34    | -  |
| UQCRC2  | 0.49 $\pm$ 0.09 | 0.38 $\pm$ 0.09 | 0.0462  | *  |
| COX2    | 0.77 $\pm$ 0.14 | 0.54 $\pm$ 0.09 | 0.0071  | ** |
| ATP5A   | 0.89 $\pm$ 0.05 | 0.85 $\pm$ 0.19 | 0.69    | -  |
| ATP5O   | 0.78 $\pm$ 0.20 | 0.52 $\pm$ 0.07 | 0.0227  | *  |

**B**

| Protein | Control         | FFI             | P value |      |
|---------|-----------------|-----------------|---------|------|
| NDUFB8  | 0.77 $\pm$ 0.06 | 0.52 $\pm$ 0.12 | 0.0087  | **   |
| SDHB    | 1.10 $\pm$ 0.13 | 0.79 $\pm$ 0.15 | 0.0035  | **   |
| UQCRB   | 0.94 $\pm$ 0.16 | 0.88 $\pm$ 0.18 | 0.61    | -    |
| UQCRC2  | 0.62 $\pm$ 0.07 | 0.44 $\pm$ 0.07 | 0.0022  | **   |
| COX2    | 0.94 $\pm$ 0.06 | 0.58 $\pm$ 0.04 | 0.0001  | **** |
| ATP5A   | 1.21 $\pm$ 0.04 | 1.02 $\pm$ 0.23 | 0.08    | -    |
| ATP5O   | 1.08 $\pm$ 0.23 | 0.78 $\pm$ 0.22 | 0.09    | -    |

**Supplementary Table III:** Gene expression of nucleolar proteins, 18S and 28S rRNAs and ribosomal proteins in the mediodorsal thalamus in FFI and control cases normalized with XPNPEP1.

| Genes encoding for | Probe          | Control     | FFI         | P Value |   |
|--------------------|----------------|-------------|-------------|---------|---|
| Nucleolar proteins | <i>UBTF</i>    | 1.00 ± 0.05 | 0.88 ± 0.12 | 0.09    | - |
|                    | <i>NCL</i>     | 1.01 ± 0.17 | 1.05 ± 0.12 | 0.69    | - |
|                    | <i>NPM1</i>    | 1.01 ± 0.14 | 1.36 ± 0.31 | 0.027   | * |
| rRNAs              | <i>rRNA18S</i> | 1.01 ± 0.19 | 1.30 ± 0.46 | 0.24    | - |
|                    | <i>rRNA28S</i> | 1.12 ± 0.56 | 2.93 ± 1.64 | 0.0287  | * |
| Ribosomal proteins | <i>RPL5</i>    | 1.01 ± 0.14 | 1.17 ± 0.15 | 0.09    | - |
|                    | <i>RPL7</i>    | 1.03 ± 0.25 | 1.27 ± 0.11 | 0.13    | - |
|                    | <i>RPL21</i>   | 1.05 ± 0.34 | 0.87 ± 0.37 | 0.40    | - |
|                    | <i>RPL22</i>   | 1.00 ± 0.09 | 1.48 ± 0.56 | 0.09    | - |
|                    | <i>RPL23A</i>  | 1.03 ± 0.27 | 1.14 ± 0.10 | 0.42    | - |
|                    | <i>RPL26</i>   | 1.03 ± 0.27 | 0.80 ± 0.44 | 0.13    | - |
|                    | <i>RPL27</i>   | 1.03 ± 0.25 | 1.44 ± 0.46 | 0.09    | - |
|                    | <i>RPL30</i>   | 1.03 ± 0.27 | 1.33 ± 0.22 | 0.08    | - |
|                    | <i>RPL31</i>   | 1.03 ± 0.30 | 1.23 ± 0.15 | 0.21    | - |
|                    | <i>RPS3A</i>   | 1.02 ± 0.22 | 1.20 ± 0.21 | 0.19    | - |
|                    | <i>RPS5</i>    | 1.01 ± 0.19 | 1.55 ± 0.63 | 0.07    | - |
|                    | <i>RPS6</i>    | 1.00 ± 0.04 | 1.53 ± 0.59 | 0.08    | - |
|                    | <i>RPS10</i>   | 1.01 ± 0.12 | 1.04 ± 0.15 | 0.66    | - |
| <i>RPS13</i>       | 1.02 ± 0.22    | 1.17 ± 0.16 | 0.24        | -       |   |
| <i>RPS17</i>       | 1.01 ± 0.13    | 1.28 ± 0.18 | 0.016       | *       |   |
| <i>RPS20</i>       | 1.02 ± 0.22    | 1.65 ± 0.51 | 0.0295      | *       |   |

**Supplementary Table IV:** Densitometric values of expression of initiation and elongation factors of protein transcription in the mediodorsal thalamus in FFI cases and controls normalized with  $\beta$ -actin

| Protein          | Control         | FFI             | P value |   |
|------------------|-----------------|-----------------|---------|---|
| NCL              | 1.60 $\pm$ 0.33 | 1.04 $\pm$ 0.34 | 0.012   | * |
| eIF2 $\alpha$    | 1.16 $\pm$ 0.22 | 0.95 $\pm$ 0.14 | 0.06    | - |
| P- eIF2 $\alpha$ | 1.90 $\pm$ 0.65 | 1.35 $\pm$ 0.53 | 0.13    | - |
| eIF5             | 2.12 $\pm$ 0.95 | 2.33 $\pm$ 1.08 | 0.72    | - |
| eEF1A            | 2.07 $\pm$ 0.17 | 1.59 $\pm$ 0.44 | 0.021   | * |
| eEF2             | 1.17 $\pm$ 0.22 | 1.18 $\pm$ 0.30 | 0.91    | - |
